# Supplementary material for: Evaluating longitudinal relationships between parental monitoring and substance use in a multi-year, intensive longitudinal study of 670 adolescent twins
Source: PubMed Central journal article supplement (PMC10213319; doi:10.3389/fpsyt.2023.1149079), 2023-05-12
Supplement: Data_Sheet_3.pdf [file Data_Sheet_3.pdf]

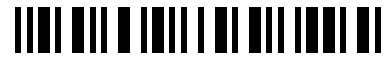

**A1. In the last 7 days, since last {date('1')}, on how many days did you drink any alcohol?**

I did not drink any alcohol in the past 7 days

One day

Two days

Three days

Four days

Five days

Six days

Seven days

Would rather not answer

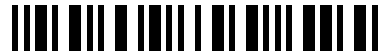

**A2. On those days that you drank alcohol, how many drinks did you usually have each day? (One "drink" is equal to 1 can or bottle of beer, a glass of wine, or a shot of hard liquor.)**

- Only part of one drink
- 1 drink
- 2 drinks
- 3 drinks
- 4 drinks
- 5 drinks
- 6 drinks (such as a 6-pack of beer or 6 shots of liquor)
- 7 drinks
- 8 drinks
- 9 drinks
- 10 drinks
- 11 drinks
- 12 drinks (such as a 12-pack of beer or 12 glasses of wine)
- 13 drinks
- 14 drinks
- 15 drinks
- 16 drinks
- 17 drinks
- 18 drinks
- 19 drinks
- 20 drinks
- More than 20 drinks
- Would rather not answer

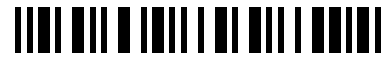

**B1. In the last 7 days, since last {date('1')}, on how many days did you use any marijuana or hashish, including smoking marijuana, edibles, vaping, dabbing, or however else you may have used marijuana?**

I did not have any marijuana in the past 7 days

One day

Two days

Three days

Four days

Five days

Six days

Seven days

Would rather not answer

**B2. On each day that you used marijuana (whether smoked, eaten, vaped, dabbed, or however it was used), how many times per day did you use enough to feel the effects?**

I never had enough to feel the effects

1 time per day

2 times per day

3 times per day

4 times per day

5 times or more per day

Would rather not answer
